# Supplementary material for: Synthesis of novel 6-[N,N-bis(2-hydroxyethyl)amino]purine nucleosides under microwave irradiation in neat water
Source: Royal Society of Chemistry journal article supplement (doi:10.1039/b902025j), 2009-01-01
Supplement: b902025j.pdf [file b902025j.pdf]

## Supporting information

### Synthesis of Novel 6-[N, N-Bis(2-hydroxyethyl)amino]purine Nucleosides under Microwave Irradiation in Neat Water

Gui-Rong Qu, Jing Wu, Yan-Yan Wu, Feng Zhang, and Hai-Ming Guo\*

*College of Chemistry and Environmental Science, Henan Normal University, Xixiang 453007, Henan, P. R. China.*

*Guohm518@hotmail.com*

|                                                               |    |
|---------------------------------------------------------------|----|
| General.....                                                  | S1 |
| Typical experimental procedure.....                           | S2 |
| Characterization of compounds.....                            | S3 |
| Copies of <sup>1</sup> H and <sup>13</sup> C NMR spectra..... | S8 |

**General:** Melting points are recorded with a micro melting point apparatus and uncorrected. NMR spectra were recorded with a 400 NMR spectrometer for <sup>1</sup>H-NMR, 100 MHz for <sup>13</sup>C-NMR. Proton chemical shifts are given in ppm relative to tetramethylsilane (0.00 ppm) in CDCl<sub>3</sub> or to the residual proton signals of the deuterated solvent DMSO-d<sub>6</sub> (2.50 ppm) for <sup>1</sup>H and <sup>13</sup>C NMR. High resolution mass spectra were taken with a 3000 mass spectrometer, using Waters Q-ToFMS/MS system. For column chromatography 200-300 mesh silica gel (GF<sub>254</sub>) was used as the stationary phase. All reactions were monitored by thin layer chromatography (TLC). All reagents and solvents were purchased from commercial sources and purified commonly before used.

All microwave irradiation experiments were carried out in the cavity of a commercially available single-mode microwave synthesis apparatus equipped with a high sensitivity infrared sensor for temperature control and measurement (MAS-I, Sineo Microwave Chemical Technology Co. Ltd., Shanghai, P. R. of China) with continuous irradiation power from 0 to 600 W. The reactions were carried out in open glass vials. The temperature was measured with an IR sensor on the outer surface of the reaction vials.

**Typical Experimental Procedure for the Reaction of Purines with Diethanolamine under Microwave Irradiation.**

Purine nucleoside **1a** (1 mmol) and water (5 mL) were put in a 25 mL glass vial equipped with a small magnetic stirring bar. To this was added diethanolamine **2a** (1.5 mmol). Then the mixture was put into the cavity of the microwave synthesis apparatus and irradiated at 400 W at 100 °C for 10 min. After completion of the reaction, the vial was cooled to room temperature. After evaporation of the water, the crude product was purified by column chromatography over silica gel using CH<sub>2</sub>Cl<sub>2</sub>:CH<sub>3</sub>OH =17:1 (v/v) as the eluent, to give **3a**.

### 2-Chloro-6-[N, N-bis(2-hydroxyethyl)amino]purine (3a)

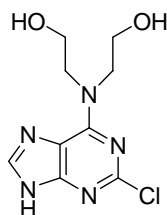

Light yellow powder, mp 239-241 °C.  $^1\text{H}$  NMR (DMSO- $d_6$ , 400 MHz)  $\delta$  13.08 (s, 1H), 8.10 (s, 1H), 4.78 (s, 2H), 4.29 (s, 2H), 3.77 (s, 2H), 3.67 (s, 4H).  $^{13}\text{C}$  NMR (DMSO- $d_6$ , 100 MHz)  $\delta$  154.1, 152.3, 152.1, 138.6, 117.6, 59.9, 58.1, 52.1, 51.2. HRMS: calcd for  $\text{C}_9\text{H}_{12}\text{ClN}_5\text{NaO}_2$  [ $\text{M} + \text{Na}^+$ ] 280.0578, found 280.0578.

### 2-Chloro-6-[N, N-bis(2-hydroxyethyl)amino]-9-( $\beta$ -D-ribofuranosyl)purine (3b)

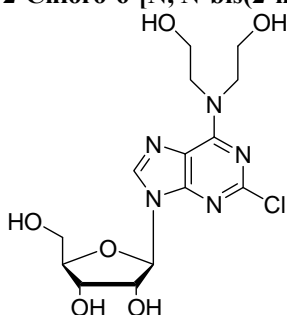

White powder, mp 100-102 °C.  $^1\text{H}$  NMR (DMSO- $d_6$ , 400 MHz)  $\delta$  8.40 (s, 1H), 5.82 (d,  $J = 5.6$  Hz, 1H), 5.50 (d,  $J = 6.0$  Hz, 1H), 5.22 (d,  $J = 4.8$  Hz, 1H), 5.07 (t,  $J = 5.6$  Hz, 1H), 4.83-4.82 (m, 2H), 4.50-4.46 (m, 1H), 4.26-4.25 (m, 2H), 4.11-4.09 (m, 1H), 3.92 (d,  $J = 3.6$  Hz, 1H), 3.76-3.75 (m, 2H), 3.65-3.62 (m, 5H), 3.55-3.51 (m, 1H).  $^{13}\text{C}$  NMR (DMSO- $d_6$ , 100 MHz)  $\delta$  154.2, 152.4, 151.1, 138.8, 118.3, 87.2, 85.5, 73.6, 70.2, 61.2, 59.7, 58.0, 52.1, 51.3. HRMS: calcd for  $\text{C}_{14}\text{H}_{21}\text{ClN}_5\text{O}_6$  [ $\text{M} + \text{H}^+$ ] 390.1180, found 390.1180.

### 2-Chloro-9-allyl-6-[N, N-bis(2-hydroxyethyl)amino]purine (3c)

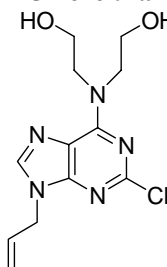

White powder, mp 137-139 °C.  $^1\text{H}$  NMR (DMSO- $d_6$ , 400 MHz)  $\delta$  8.14 (s, 1H), 6.07-6.01 (m, 1H), 5.20 (d,  $J = 10.0$  Hz, 1H), 5.02 (d,  $J = 16.8$  Hz, 1H), 4.80-4.75 (m, 4H), 4.29 (s, 2H), 3.77 (s, 2H), 3.67 (s, 4H).  $^{13}\text{C}$  NMR (DMSO- $d_6$ , 100 MHz)  $\delta$  154.2, 152.5, 151.2, 140.4, 133.0, 117.8, 117.4, 59.8, 58.1, 52.1, 51.4, 45.0. HRMS: calcd for  $\text{C}_{12}\text{H}_{16}\text{ClN}_5\text{NaO}_2$  [ $\text{M} + \text{Na}^+$ ] 320.0891, found 320.0891.

**2-Chloro-9-(phenylmethyl)-6-[N, N-bis(2-hydroxyethyl)amino]purine (3d)**

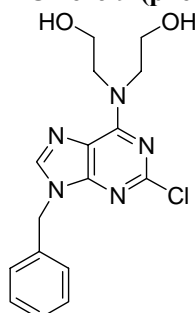

White powder, mp 144-146 °C.  $^1\text{H}$  NMR (DMSO- $d_6$ , 400 MHz)  $\delta$  8.28 (s, 1H), 7.37-7.26 (m, 5H), 5.35 (s, 2H), 4.81 (s, 2H), 4.28 (s, 2H), 3.77 (s, 2H), 3.66 (d,  $J$  = 4.8 Hz, 4H).  $^{13}\text{C}$  NMR (DMSO- $d_6$ , 100 MHz)  $\delta$  154.2, 152.6, 151.3, 140.5, 136.6, 128.7, 127.7, 127.2, 118.0, 59.8, 58.0, 52.1, 51.4, 46.1. HRMS: calcd for  $\text{C}_{16}\text{H}_{18}\text{ClN}_5\text{NaO}_2$  [ $\text{M} + \text{Na}^+$ ] 370.1047, found 370.1049.

**6-[N, N-Bis(2-hydroxyethyl)amino]purine (3e)**

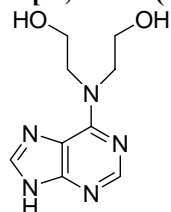

White powder, mp 214-215 °C.  $^1\text{H}$  NMR (DMSO- $d_6$ , 400 MHz)  $\delta$  12.97 (s, 1H), 8.17 (s, 1H), 8.10 (s, 1H), 4.83 (s, 2H), 4.27-4.21 (m, 2H), 3.83-3.81 (m, 2H), 3.67 (s, 4H).  $^{13}\text{C}$  NMR (DMSO- $d_6$ , 100 MHz)  $\delta$  153.6, 151.7, 151.1, 138.1, 118.5, 60.1, 58.6, 52.0, 51.4. HRMS: calcd for  $\text{C}_9\text{H}_{14}\text{N}_5\text{O}_2$  [ $\text{M} + \text{H}^+$ ] 224.1147, found 224.1147.

**6-[N, N-Bis(2-hydroxyethyl)amino]-9-( $\beta$ -D-ribofuranosyl)purine (3f)**

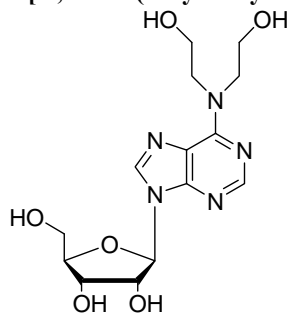

White powder, mp 221-223 °C.  $^1\text{H}$  NMR (DMSO- $d_6$ , 400 MHz)  $\delta$  8.36 (s, 1H), 8.19 (s, 1H), 5.88 (d,  $J$  = 6.0 Hz, 1H), 5.46 (d,  $J$  = 6.4 Hz, 1H), 5.39-5.36 (m, 1H), 5.19 (d,  $J$  = 4.4 Hz, 1H), 4.81-4.79 (m, 2H), 4.59-4.55 (m, 1H), 4.26-4.23 (m, 2H), 4.14-4.11 (m, 1H), 3.94 (d,  $J$  = 3.2 Hz, 1H), 3.81-3.80 (m, 2H), 3.66-3.64 (m, 5H), 3.56-3.52 (m, 1H).  $^{13}\text{C}$  NMR (DMSO- $d_6$ , 100 MHz)  $\delta$  153.7, 151.5, 149.8, 138.7, 119.4, 87.7, 85.6, 73.3, 70.4, 61.4. HRMS: calcd for  $\text{C}_{14}\text{H}_{21}\text{N}_5\text{NaO}_6$  [ $\text{M} + \text{Na}^+$ ] 378.1390, found 378.1389.

**9-Allyl-6-[N, N-bis(2-hydroxyethyl)amino]purine (3g)**

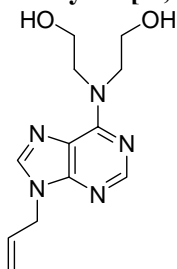

White powder, mp 144-146 °C. <sup>1</sup>H NMR (DMSO-d<sub>6</sub>, 400 MHz) δ 8.20 (s, 1H), 8.13 (s, 1H), 6.10-6.00 (m, 1H), 5.18 (dd, *J* = 10.4 Hz, 1.2 Hz, 1H), 5.01 (dd, *J* = 17.2 Hz, 1.2 Hz, 1H), 4.83-4.78 (m, 4H), 4.27-4.26 (m, 2H), 3.81 (s, 1H), 3.67 (s, 4H). <sup>13</sup>C NMR (DMSO-d<sub>6</sub>, 100 MHz) δ 153.7, 151.7, 150.1, 139.6, 133.2, 118.7, 117.3, 58.7, 51.7, 44.7. HRMS: calcd for C<sub>12</sub>H<sub>17</sub>N<sub>5</sub>NaO<sub>2</sub> [M + Na<sup>+</sup>] 286.1280, found 286.1280.

**9-n-Butyl-6-[N, N-bis(2-hydroxyethyl)amino]purine (3h)**

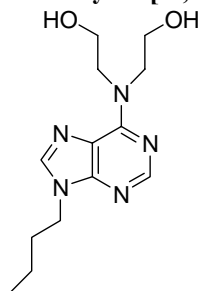

Light yellow crystal, mp 93-94 °C. <sup>1</sup>H NMR (CDCl<sub>3</sub>, 400 MHz) δ 8.31 (s, 1H), 7.76 (s, 1H), 4.90-4.87 (m, 2H), 4.19 (t, *J* = 7.2 Hz, 2H), 4.10 (s, 4H), 3.98-3.96 (m, 4H), 1.89-1.82 (m, 2H), 1.39-1.34 (m, 2H), 0.96 (t, *J* = 7.2 Hz, 3H). <sup>13</sup>C NMR (CDCl<sub>3</sub>, 100 MHz) δ 155.7, 151.9, 150.6, 138.9, 119.7, 61.4, 52.2, 43.7, 31.9, 19.8, 13.4. HRMS: calcd for C<sub>13</sub>H<sub>21</sub>N<sub>5</sub>NaO<sub>2</sub> [M + Na<sup>+</sup>] 302.1593, found 302.1592.

**9-(Phenylmethyl)-6-[N, N-bis(2-hydroxyethyl)amino]purine (3i)**

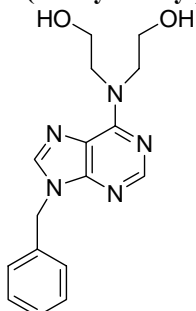

White powder, mp 93-95 °C. <sup>1</sup>H NMR (CDCl<sub>3</sub>, 400 MHz) δ 8.34 (s, 1H), 7.72 (s, 1H), 7.36-7.26 (m, 5H), 5.35 (s, 2H), 4.88 (s, 2H), 4.09 (s, 4H), 3.97-3.95 (m, 4H). <sup>13</sup>C NMR (CDCl<sub>3</sub>, 100 MHz) δ 155.9, 152.3, 150.8, 138.8, 135.4, 129.0, 128.4, 127.8, 119.6, 61.5, 58.3, 52.3, 47.2. HRMS: calcd for C<sub>16</sub>H<sub>19</sub>N<sub>5</sub>NaO<sub>2</sub> [M + Na<sup>+</sup>] 336.1437, found 336.1436.

**9-(2-Chlorophenylmethyl)-6-[N, N-bis(2-hydroxyethyl)amino]purine (3j)**

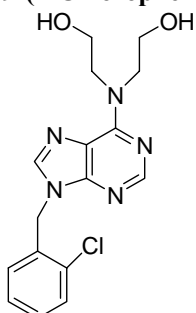

White crystal, mp 140-141 °C.  $^1\text{H}$  NMR ( $\text{CDCl}_3$ , 400 MHz)  $\delta$  8.27 (s, 1H), 7.75 (s, 1H), 7.37-7.15 (m, 4H), 5.41 (s, 2H), 4.68 (s, 2H), 4.03 (s, 4H), 3.91-3.89 (m, 4H).  $^{13}\text{C}$  NMR ( $\text{CDCl}_3$ , 100 MHz)  $\delta$  155.9, 152.2, 150.8, 139.0, 133.3, 132.9, 130.1, 129.9, 129.8, 127.4, 119.5, 61.5, 52.2, 44.8. HRMS: calcd for  $\text{C}_{16}\text{H}_{18}\text{ClN}_5\text{NaO}_2$  [ $\text{M} + \text{Na}^+$ ] 370.1047, found 370.1047.

**2-Amino-6-[N, N-bis(2-hydroxyethyl)amino]purine (3k)**

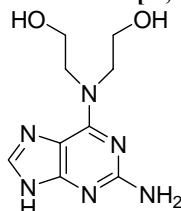

White powder, mp 196-198 °C.  $^1\text{H}$  NMR ( $\text{DMSO-d}_6$ , 400 MHz) 12.14-12.11 (m, 1H), 7.66 (s, 1H), 5.66 (s, 2H), 4.80-4.78 (m, 2H), 4.16-4.10 (m, 4H), 3.80-3.75 (m, 4H).  $^{13}\text{C}$  NMR ( $\text{DMSO-d}_6$ , 100 MHz)  $\delta$  159.3, 154.0, 153.3, 134.6, 112.9, 59.8, 51.2. HRMS: calcd for  $\text{C}_9\text{H}_{15}\text{N}_6\text{O}_2$  [ $\text{M} + \text{H}^+$ ] 239.1256, found 239.1254.

**2-Amino-6-[N, N-bis(2-hydroxyethyl)amino]-9-( $\beta$ -D-ribofuranosyl)purine (3l)**

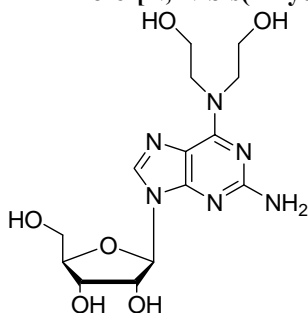

White crystal, mp 100-102 °C.  $^1\text{H}$  NMR ( $\text{DMSO-d}_6$ , 400 MHz) 7.95 (s, 1H), 5.79-5.74 (m, 3H), 5.40-5.35 (m, 2H), 5.13 (d,  $J = 4.4$  Hz, 1H), 4.77 (t,  $J = 5.2$  Hz, 2H), 4.49-4.45 (m, 1H), 4.10-4.07 (m, 3H), 3.88 (d,  $J = 3.2$  Hz, 1H), 3.65-3.61 (m, 7H), 3.54-3.52 (m, 1H).  $^{13}\text{C}$  NMR ( $\text{DMSO-d}_6$ , 100 MHz)  $\delta$  159.1, 154.1, 152.4, 135.2, 113.5, 86.7, 85.2, 73.1, 70.4, 61.5. HRMS: calcd for  $\text{C}_{14}\text{H}_{23}\text{N}_6\text{O}_6$  [ $\text{M} + \text{H}^+$ ] 371.1679, found 371.1678

**9-Allyl-2-(N, N-diallyl)-6-[N, N-bis(2-hydroxyethyl)amino]purine (3m)**

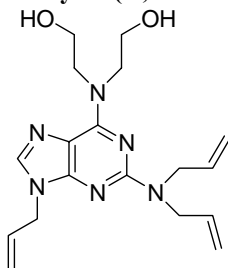

White powder, mp 107-108 °C. <sup>1</sup>H NMR (DMSO-d<sub>6</sub>, 400 MHz) δ 7.45 (s, 1H), 6.00-5.95 (m, 1H), 5.90-5.83 (m, 2H), 5.28-5.11 (m, 6H), 4.63 (d, *J* = 6 Hz, 2H), 4.20 (d, *J* = 5.6 Hz, 4H), 4.03 (s, 4H), 3.94-3.92 (m, 4H). <sup>13</sup>C NMR (DMSO-d<sub>6</sub>, 100 MHz) δ 158.0, 156.3, 153.2, 136.0, 134.6, 132.2, 118.6, 115.9, 113.2, 61.4, 51.0, 49.3, 45.2. HRMS: calcd for C<sub>18</sub>H<sub>27</sub>N<sub>6</sub>O<sub>2</sub> [M + H<sup>+</sup>] 359.2195, found 359.2192

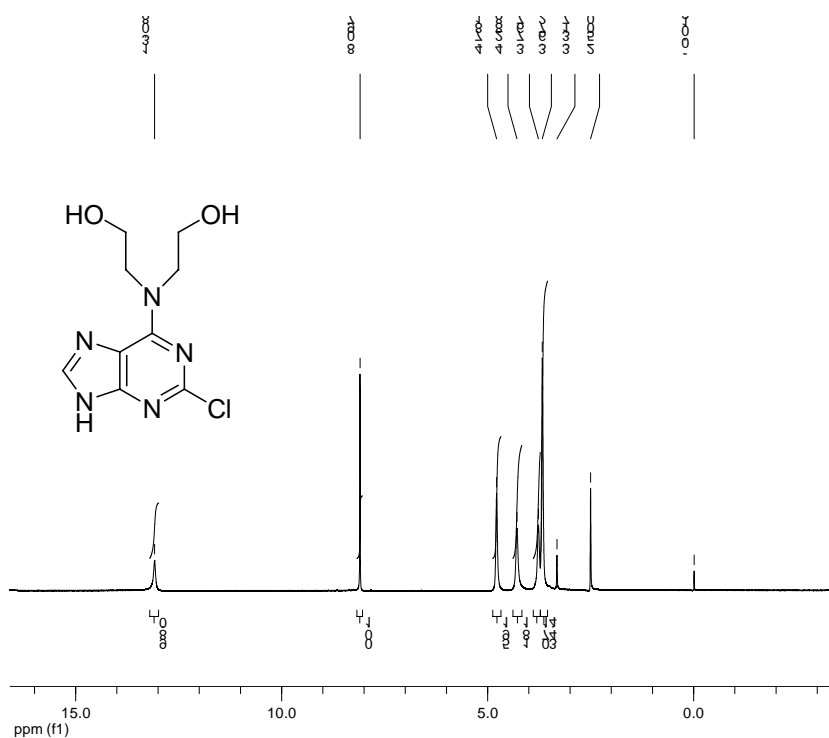

Date: 3 Dec 2008  
 Document's Title: 11  
 Spectrum Title: 1H solvent:DMSO No:1 2008.11.21  
 Frequency (MHz): (f1) 400.203  
 Original Points Count: (f1) 16384  
 Actual Points Count: (f1) 32768  
 Acquisition Time (sec): (f1) 2.0447  
 Spectral Width (ppm): (f1) 20.022  
 Pulse Program: ZG30  
 Temperature: 303.16  
 Number of Scans: 16  
 Acq. Date: Sun Nov 23 03:49:01 PM

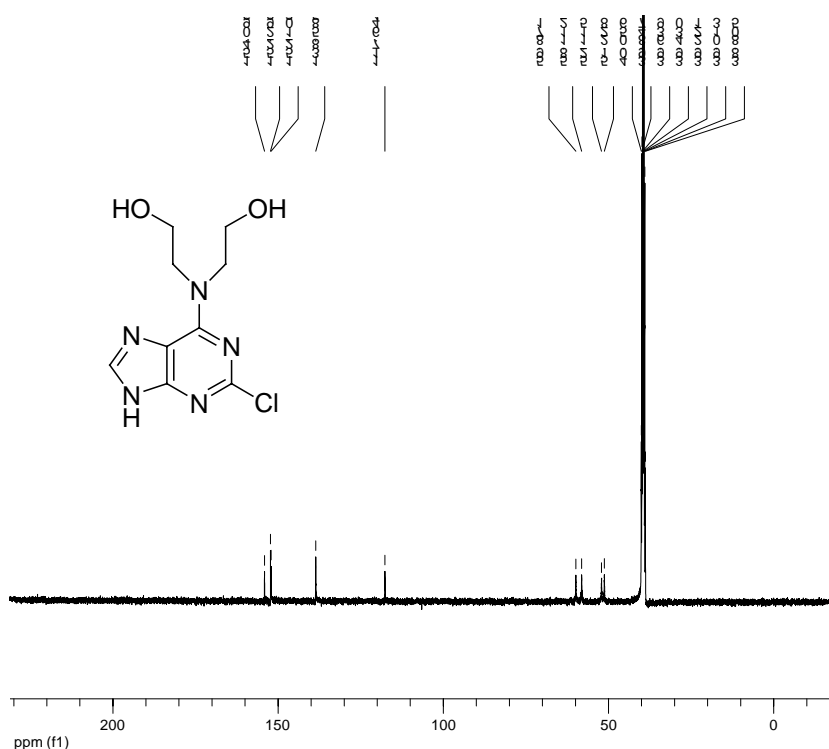

Date: 3 Dec 2008  
 Document's Title: 21  
 Spectrum Title: C13 solvent:DMSO ...:1 2008.11.20  
 Frequency (MHz): (f1) 100.641  
 Original Points Count: (f1) 16384  
 Actual Points Count: (f1) 32768  
 Acquisition Time (sec): (f1) 0.6521  
 Spectral Width (ppm): (f1) 249.656  
 Pulse Program: ZGDC30  
 Temperature: 299.86  
 Number of Scans: 1352  
 Acq. Date: Wed Nov 26 08:13:43 AM



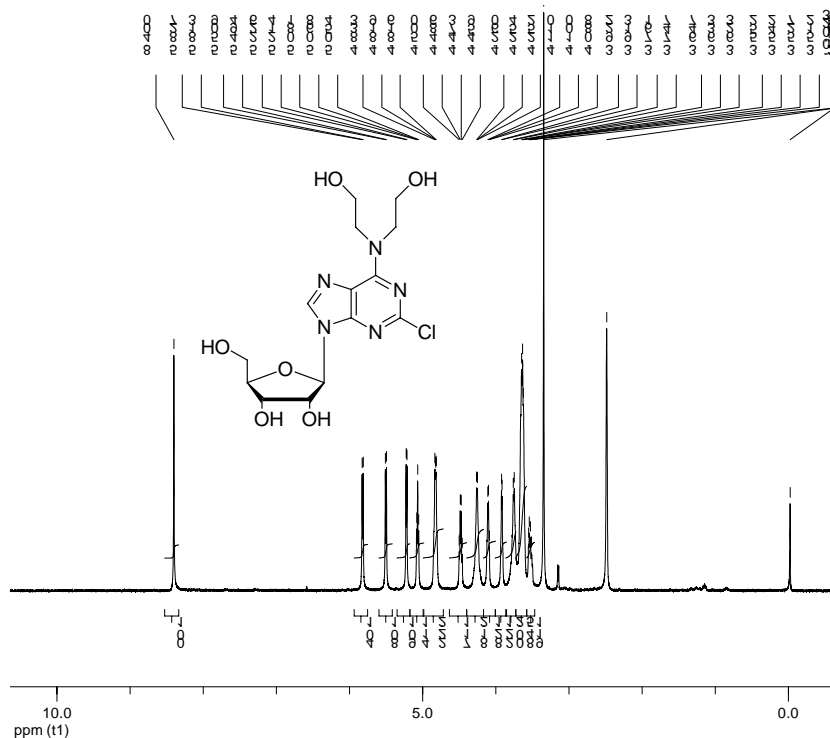

Date: 3 Dec 2008  
Document's Title: 16  
Spectrum Title: 1H sdrvnt:DMSO No:6 2008.11.18  
Frequency (MHz): (f1) 400.203  
Original Points Count: (f1) 16384  
Actual Points Count: (f1) 32768  
Acquisition Time (sec): (f1) 2.0447  
Spectral Width (ppm): (f1) 20.022  
Pulse Program: zg30  
Temperature: 290.46  
Number of Scans: 8  
Acq. Date: Tue Nov 18 09:14:46 PM

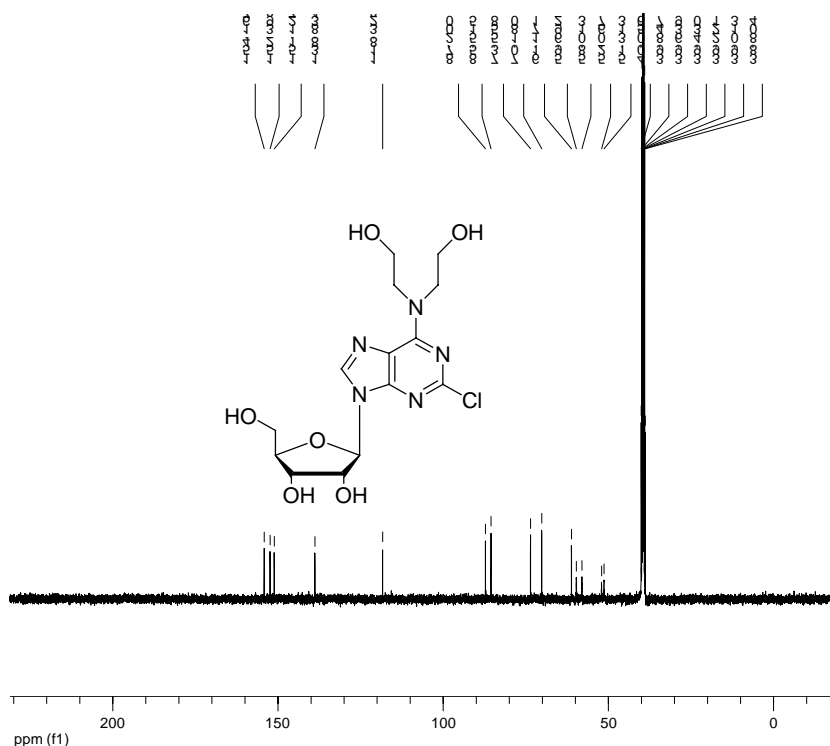

Date: 3 Dec 2008  
Document's Title: 26  
Spectrum Title: 13C sdrvnt:DMSO No:6 2008.11.18  
Frequency (MHz): (f1) 100.641  
Original Points Count: (f1) 16384  
Actual Points Count: (f1) 32768  
Acquisition Time (sec): (f1) 0.6521  
Spectral Width (ppm): (f1) 249.656  
Pulse Program: zgpg30  
Temperature: 303.16  
Number of Scans: 271  
Acq. Date: Mon Nov 24 09:39:18 PM

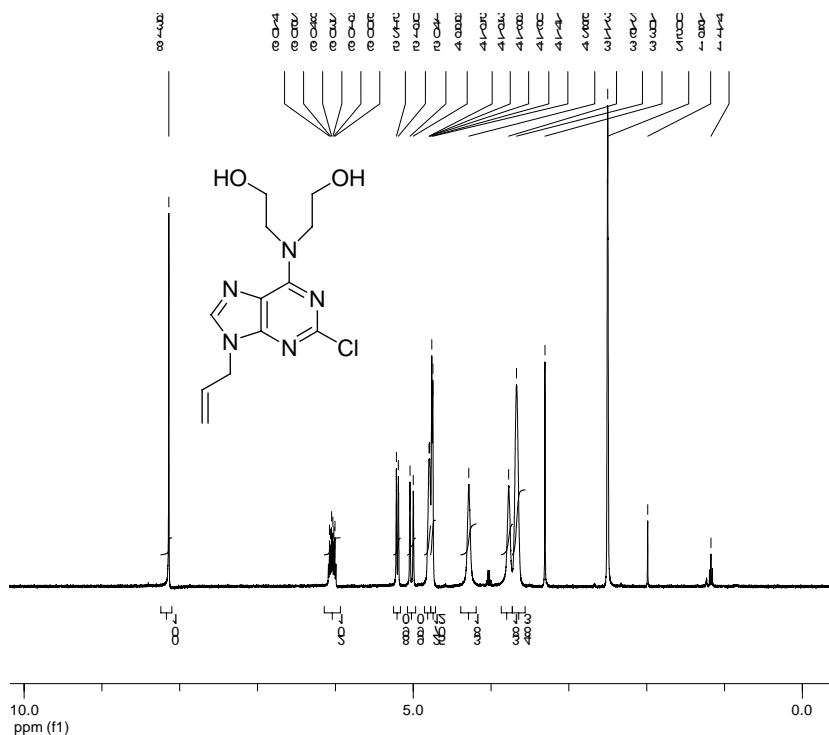

**Date:**  
3 Dec 2008  
**Document's Title:**  
11  
**Spectrum Title:**  
1H solvent:DMSO No:1 2007.11.23  
**Frequency (MHz):**  
(f1) 400.203  
**Original Points Count:**  
(f1) 16384  
**Actual Points Count:**  
(f1) 32768  
**Acquisition Time (sec):**  
(f1) 2.0447  
**Spectral Width (ppm):**  
(f1) 20.022  
**Pulse Program:**  
ZG30  
**Temperature:**  
303.16  
**Number of Scans:**  
8  
**Acq. Date:**  
Fri Nov 23 03:05:04 PM

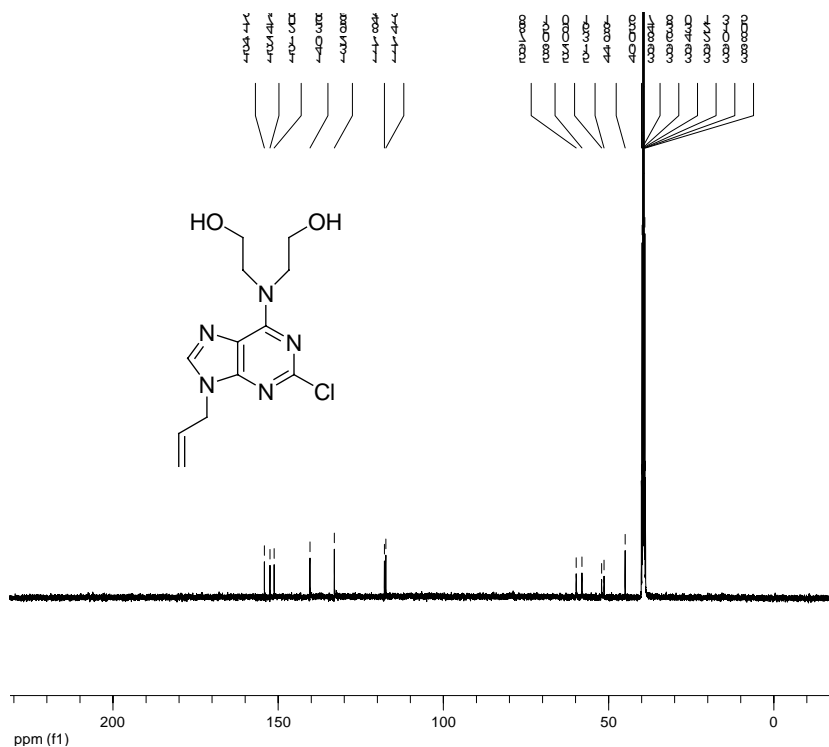

**Date:**  
3 Dec 2008  
**Document's Title:**  
24  
**Spectrum Title:**  
C13 solvent:DMSO No:4 2008.11.12  
**Frequency (MHz):**  
(f1) 100.641  
**Original Points Count:**  
(f1) 16384  
**Actual Points Count:**  
(f1) 32768  
**Acquisition Time (sec):**  
(f1) 0.6521  
**Spectral Width (ppm):**  
(f1) 249.656  
**Pulse Program:**  
ZGDC30  
**Temperature:**  
232.46  
**Number of Scans:**  
867  
**Acq. Date:**  
Thu Nov 13 07:48:00 PM

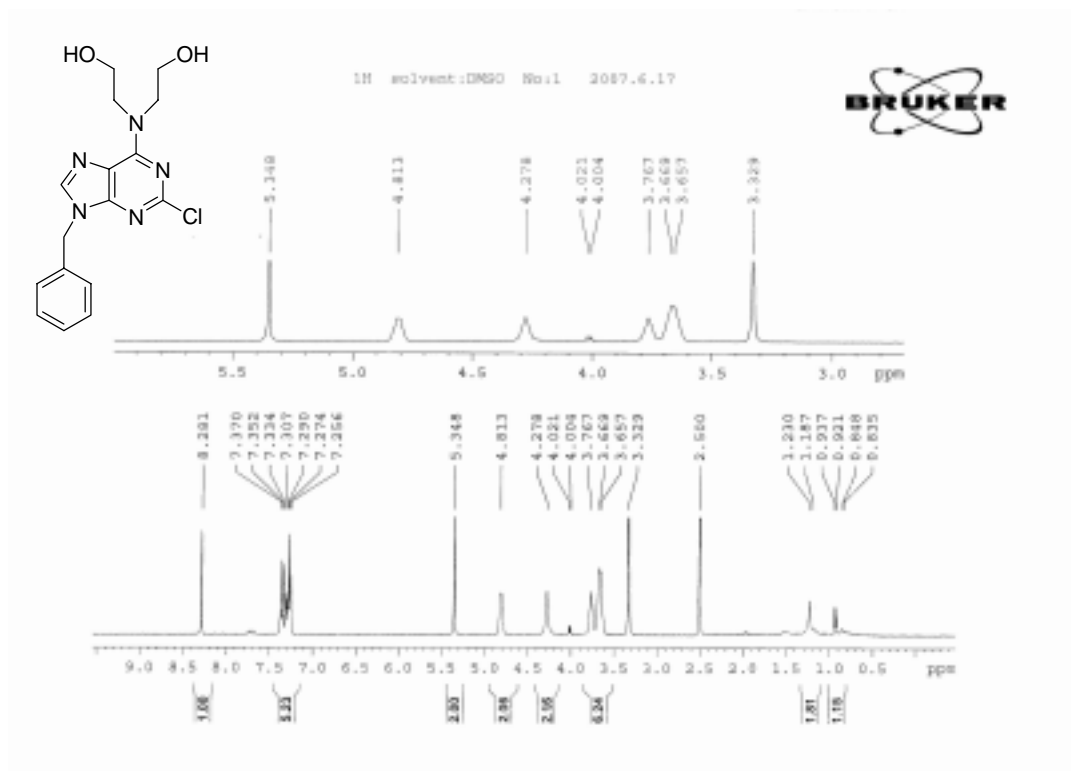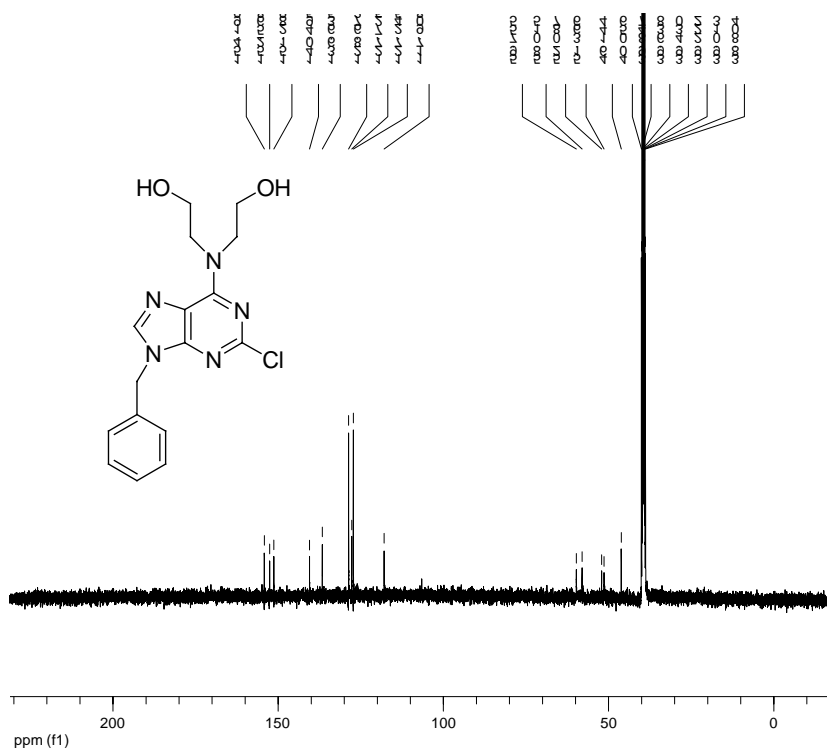

Date: 3 Dec 2008  
 Document's Title: 23  
 Spectrum Title: C13 solvent: DMSO No:3 2008.11.12  
 Frequency (MHz): (f1) 100.641  
 Original Points Count: (f1) 16384  
 Actual Points Count: (f1) 32768  
 Acquisition Time (sec): (f1) 0.6521  
 Spectral Width (ppm): (f1) 249.656  
 Pulse Program: ZGDC30  
 Temperature: 232.46  
 Number of Scans: 959  
 Acq. Date: Thu Nov 13 12:23:57 AM



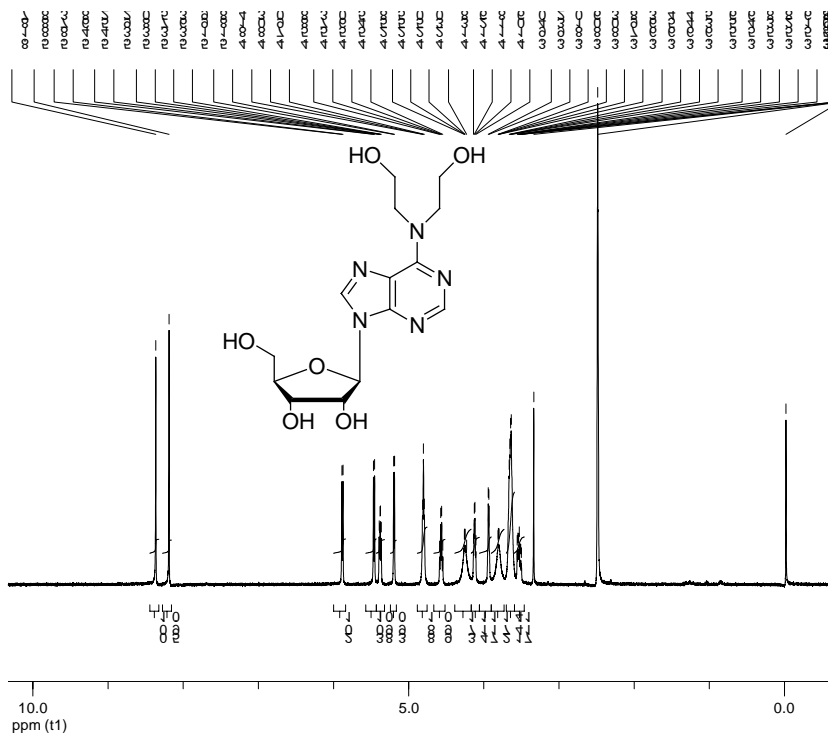

**Date:**  
3 Dec 2008

**Document's Title:**  
17

**Spectrum Title:**  
1H solvent:DMSO No:7 2008.11.18

**Frequency (MHz):**  
(f1) 400.203

**Original Points Count:**  
(f1) 16384

**Actual Points Count:**  
(f1) 32768

**Acquisition Time (sec):**  
(f1) 2.0447

**Spectral Width (ppm):**  
(f1) 20.022

**Pulse Program:**  
ZG30

**Temperature:**  
290.36

**Number of Scans:**  
8

**Acq. Date:**  
Tue Nov 18 09:17:16 PM

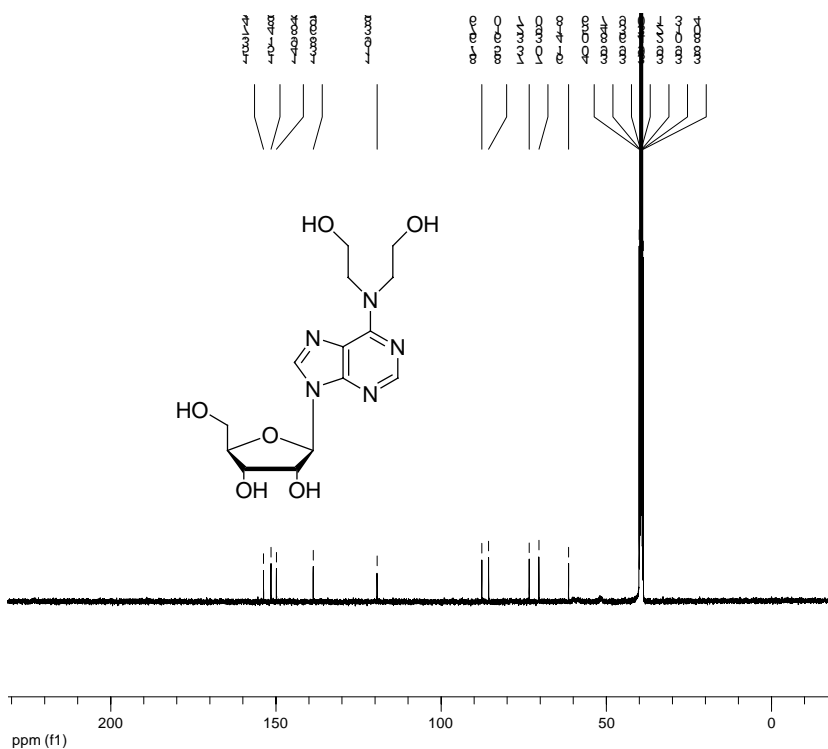

**Date:**  
3 Dec 2008

**Document's Title:**  
27

**Spectrum Title:**  
C13 solvent:DMSO No:7 2008.11.18

**Frequency (MHz):**  
(f1) 100.641

**Original Points Count:**  
(f1) 16384

**Actual Points Count:**  
(f1) 32768

**Acquisition Time (sec):**  
(f1) 0.6521

**Spectral Width (ppm):**  
(f1) 249.656

**Pulse Program:**  
ZGDC30

**Temperature:**  
303.16

**Number of Scans:**  
2877

**Acq. Date:**  
Mon Nov 24 10:36:45 PM



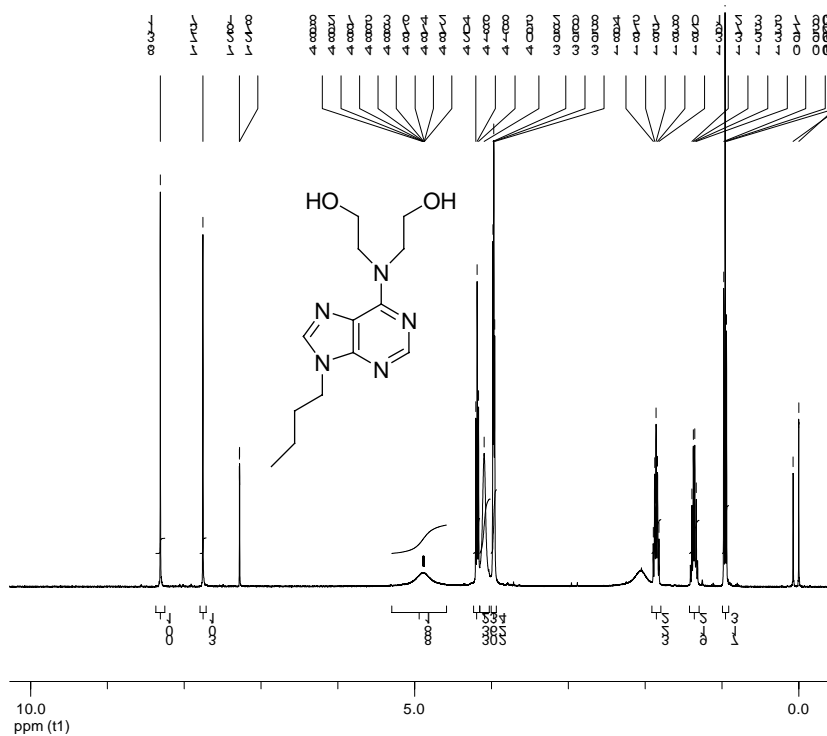

**Date:**  
3 Dec 2008  
**Document's Title:**  
12  
**Spectrum Title:**  
1H solvent:CDCl3 No:12(2) 2008.9.7  
**Frequency (MHz):**  
(f1) 400.203  
**Original Points Count:**  
(f1) 16384  
**Actual Points Count:**  
(f1) 32768  
**Acquisition Time (sec):**  
(f1) 2.0447  
**Spectral Width (ppm):**  
(f1) 20.022  
**Pulse Program:**  
ZG30  
**Temperature:**  
294.26  
**Number of Scans:**  
8  
**Acq. Date:**  
Sun Sep 07 02:37:13 PM

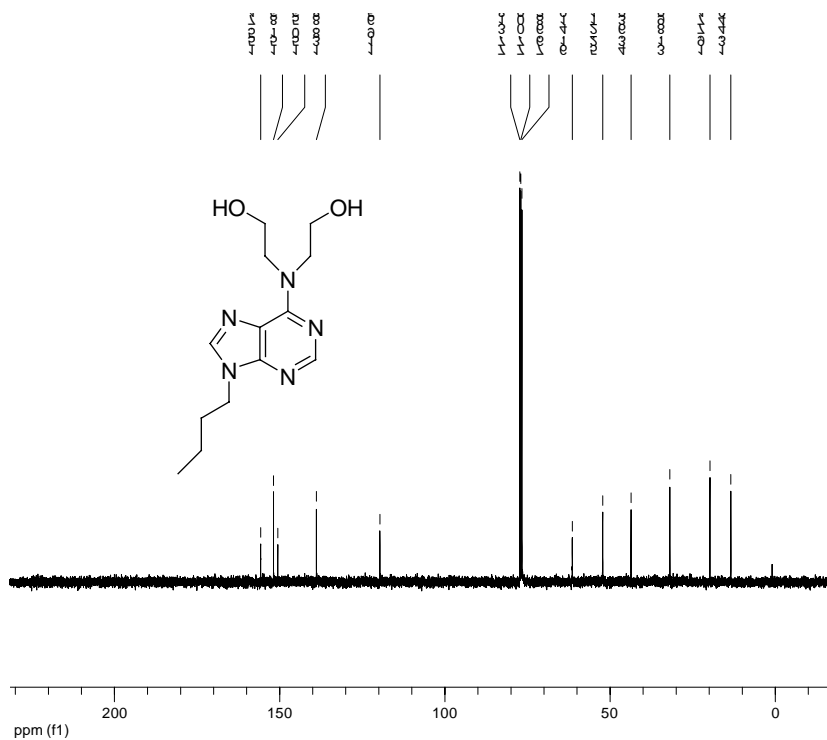

**Date:**  
3 Dec 2008  
**Document's Title:**  
22  
**Spectrum Title:**  
C13 solvent:CDCl3 No:2 2008.11.10  
**Frequency (MHz):**  
(f1) 100.641  
**Original Points Count:**  
(f1) 16384  
**Actual Points Count:**  
(f1) 32768  
**Acquisition Time (sec):**  
(f1) 0.6521  
**Spectral Width (ppm):**  
(f1) 249.656  
**Pulse Program:**  
ZGDC30  
**Temperature:**  
232.46  
**Number of Scans:**  
44  
**Acq. Date:**  
Mon Nov 10 11:01:29 PM

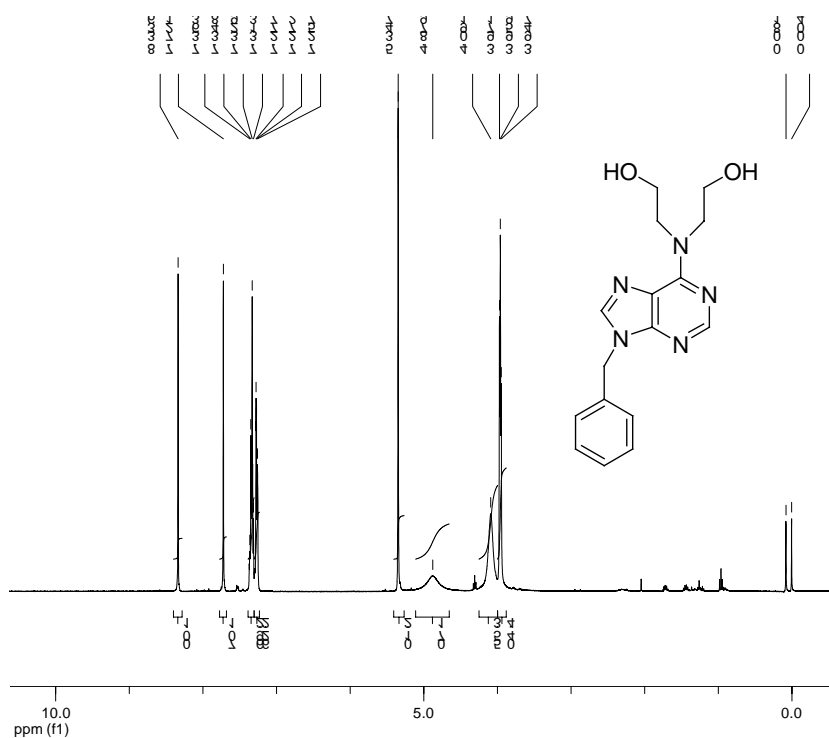

**Date:**  
3 Dec 2008  
**Document's Title:**  
11  
**Spectrum Title:**  
1H solvent:CDCl3 No:1 2008.11.10  
**Frequency (MHz):**  
(f1) 400.203  
**Original Points Count:**  
(f1) 16384  
**Actual Points Count:**  
(f1) 32768  
**Acquisition Time (sec):**  
(f1) 2.0447  
**Spectral Width (ppm):**  
(f1) 20.022  
**Pulse Program:**  
ZG30  
**Temperature:**  
291.96  
**Number of Scans:**  
8  
**Acq. Date:**  
Mon Nov 10 10:34:02 PM

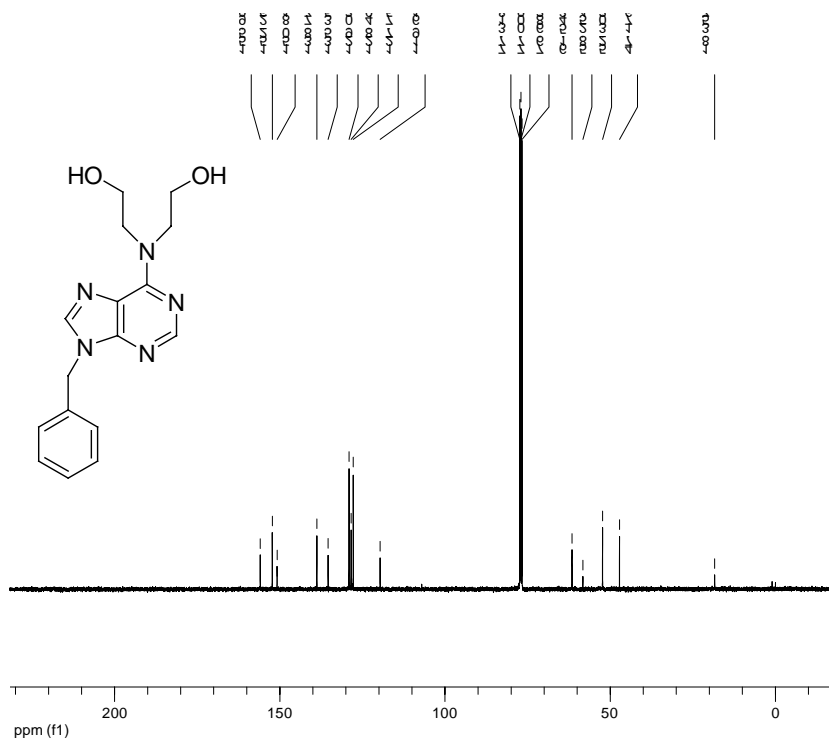

**Date:**  
3 Dec 2008  
**Document's Title:**  
28  
**Spectrum Title:**  
C13 solvent:CDCl3 No:8 2008.11.18  
**Frequency (MHz):**  
(f1) 100.641  
**Original Points Count:**  
(f1) 16384  
**Actual Points Count:**  
(f1) 32768  
**Acquisition Time (sec):**  
(f1) 0.6521  
**Spectral Width (ppm):**  
(f1) 249.656  
**Pulse Program:**  
ZGDC30  
**Temperature:**  
303.16  
**Number of Scans:**  
386  
**Acq. Date:**  
Tue Nov 25 07:58:51 AM







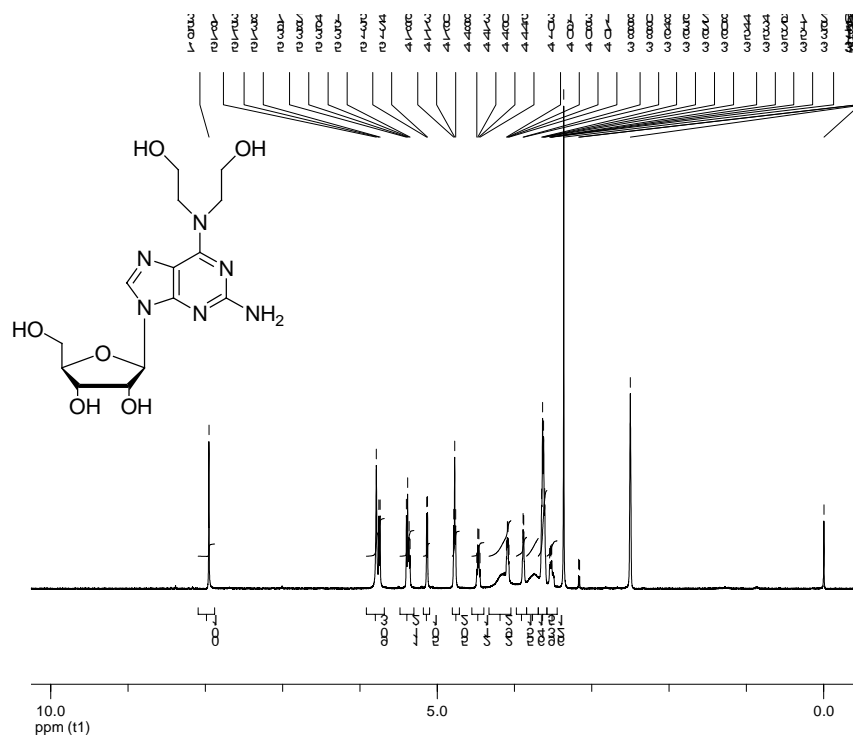

**Date:** 3 Dec 2008  
**Document's Title:** 14  
**Spectrum Title:** 1H solvent:CDCl3 No:1 2008.11.18  
**Frequency (MHz):** (f1) 400.203  
**Original Points Count:** (f1) 16384  
**Actual Points Count:** (f1) 32768  
**Acquisition Time (sec):** (f1) 2.0447  
**Spectral Width (ppm):** (f1) 20.022  
**Pulse Program:** ZG30  
**Temperature:** 290.36  
**Number of Scans:** 8  
**Acq. Date:** Tue Nov 18 09:08:35 PM

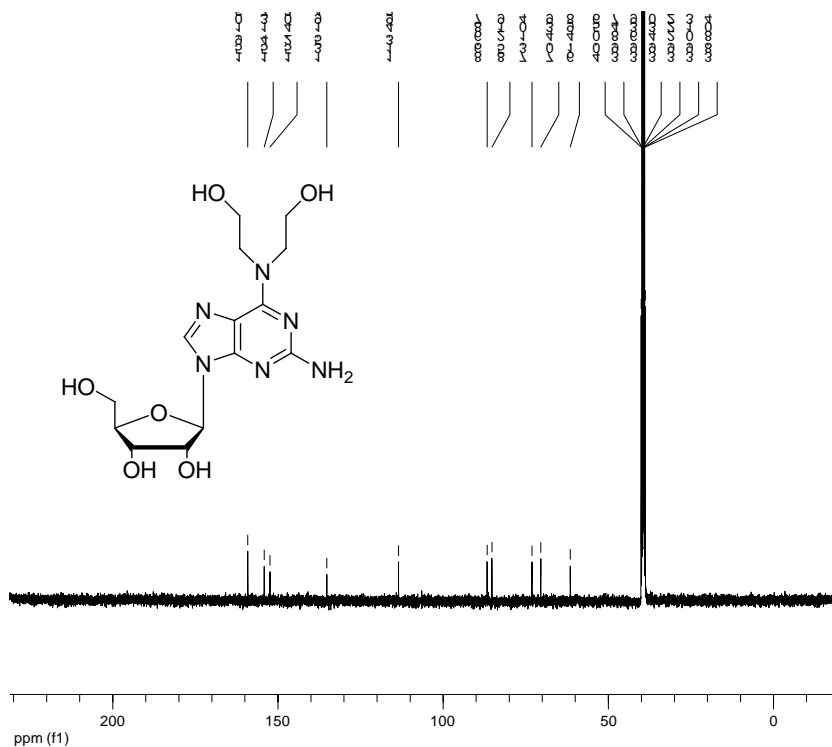

**Date:** 3 Dec 2008  
**Document's Title:** 24  
**Spectrum Title:** C13 solvent:DMSO No:4 2008.11.18  
**Frequency (MHz):** (f1) 100.641  
**Original Points Count:** (f1) 16384  
**Actual Points Count:** (f1) 32768  
**Acquisition Time (sec):** (f1) 0.6521  
**Spectral Width (ppm):** (f1) 249.656  
**Pulse Program:** ZGDC30  
**Temperature:** 303.16  
**Number of Scans:** 509  
**Acq. Date:** Mon Nov 24 08:16:11 PM

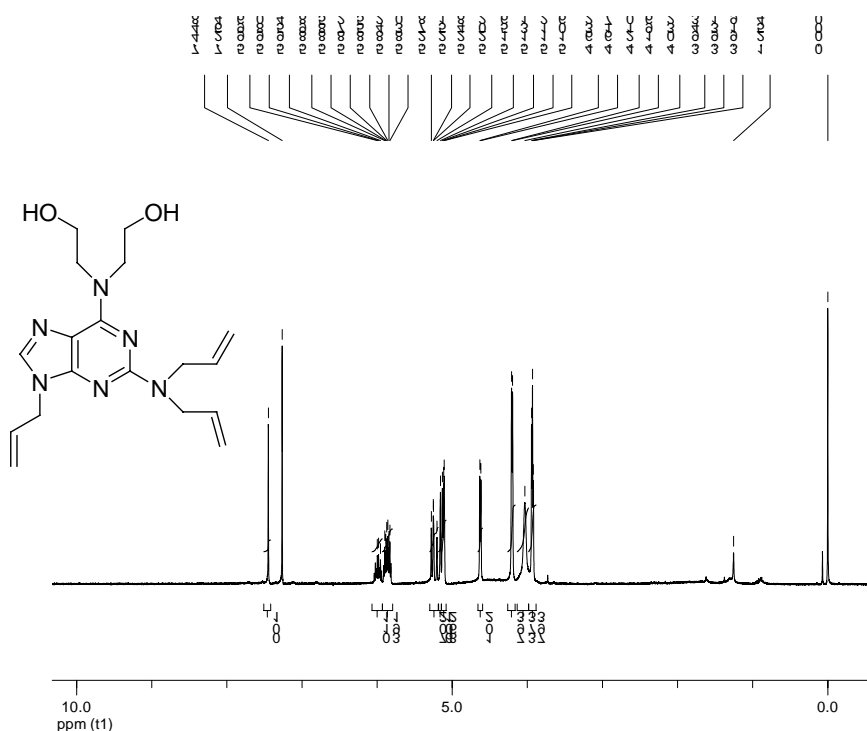

**Date:** 3 Dec 2008  
**Document's Title:** 14  
**Spectrum Title:** 1H solvent:CDCl3 No:4 2008.9.7  
**Frequency (MHz):** (f1) 400.203  
**Original Points Count:** (f1) 16384  
**Actual Points Count:** (f1) 32768  
**Acquisition Time (sec):** (f1) 2.0447  
**Spectral Width (ppm):** (f1) 20.022  
**Pulse Program:** Z330  
**Temperature:** 294.25  
**Number of Scans:** 8  
**Acq. Date:** Sun Sep 07 02:41:34 PM

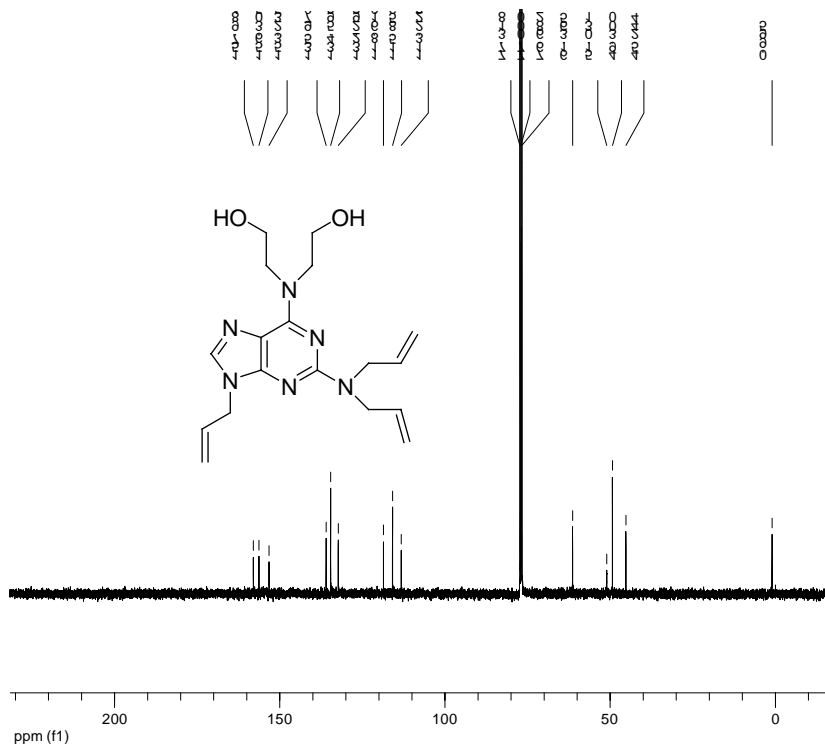

**Date:** 3 Dec 2008  
**Document's Title:** 22  
**Spectrum Title:** C13 solvent:CDCl3 No:2 2008.11.12  
**Frequency (MHz):** (f1) 100.641  
**Original Points Count:** (f1) 16384  
**Actual Points Count:** (f1) 32768  
**Acquisition Time (sec):** (f1) 0.6521  
**Spectral Width (ppm):** (f1) 249.656  
**Pulse Program:** Z33DC3  
**Temperature:** 291.95  
**Number of Scans:** 252  
**Acq. Date:** Thu Nov 13 09:58:39 AM
